# Supplementary material
Source: PubMed Central journal article supplement (PMC7415732)
Supplement: NIHMS1591982-supplement-1591982_Sup_Note.pdf [file NIHMS1591982-supplement-1591982_Sup_Note.pdf]

## Supplementary Note

### Cell state identification

To connect our gene expression signatures to cell states, we searched localized gene expression data from whole mount *in situ* hybridization (e.g. using the Gene eXpression Database (GXD): <http://www.informatics.jax.org/expression.shtml>), transgenic reporters or single-cell expression analysis. We compared these data to a state by gene matrix that reports the percent of positive cells in which transcripts of a given gene were detected (**Supplementary Table 4**). Even in this context, the percent detected is sensitive to the absolute expression level due to the sparse, drop-out prone nature of single-cell expression data. We called a gene as specific to a state by comparing its expression estimate within that state to all other states.

Our cell state annotation considers the developmental stage in which a cell state is present as well as the combination of expressed genes. Its nomenclature is intended to serve as an orientation, referring to cell types, anatomical structures or compartments within the embryo from which a subset of the state's cells originate. This is particularly relevant for later time points, where embryos are more complex and spatially resolved as well as less deeply sampled. Thus, several cell states are likely to contain various related cell types and we highlight these considerations below. For example, the “primitive heart tube” comprises cells expressing markers for this embryonic structure, such as *Nkx2.5* and *Hcn4*, but may also contain other myogenic cell types of the developing heart, such as cells of the secondary heart field (PMID: 23974038, PMID: 12141429, PMID: 22521611).

We also placed our states in a lineage tree according to expected developmental relationships, suggesting a hierarchical and timely ordered occurrence. However, the occurrence of many states that were placed consecutively in the tree partially overlap, resulting in states connected by arrows even though some of their cells may transiently coexist within the same embryo (e.g. ‘23–notochord’ proceeds from ‘38–node’ even though they temporally overlap in E7.5, but state 38 diminishes after this time point while 23 remains stable into E8.5).

We provide the references as Pubmed IDs rather than formatting a separate reference to facilitate follow up for the reader. At the end of this document we provide information on the comparability between the WT single-cell reference of this study and the one by Pijuan-Sala *et al.*

### Epiblast

Cluster 17 represents the “**epiblast**,” the cell state of the embryo proper mainly composed of pluripotent cells that are not part of the primitive streak. Its presence is restricted to our E6.5 timepoint and it displays the highest expression of *Otx2* (PMID: 15201223), *Zic2* (PMID: 15261827), *Nodal* (PMID: 9056778) and *Fgf5* (PMID: 24131634). *Fgf4* expression excludes the possibility of cluster 17 being of extraembryonic ectodermal or endodermal nature (PMID: 1618140). High *Utf1* expression argues against a mesodermal nature, as this gene was reported to be expressed in pluripotent cells and extraembryonic ectoderm but not expressed in primitive mesoderm (PMID: 9524124), which agrees with its comparatively reduced prevalence in states of the primitive streak (see below).

### Embryonic mesoderm lineage

The primitive streak states (37, 3, 2) were characterized by the expression of *T* (PMID: 1821859), *Evx1* (PMID: 1349539) and *Lhx1* (PMID: 10328927). We assigned cluster 37 to “**primitive streak early**” as it is present at E7.0 and expresses *Mesp1*, which is detected in ingressing mesodermal cells as they pass through the primitive streak (PMID: 10393122) as well as *Dll1*, which was reported for the primitive streak and mesoderm at this stage (PMID:

7671806). Cluster 3 is maximal at E7.0 and characterized by a fraction of cells positive for the mesendodermal markers *Foxa2* (PMID: 8375339, PMID: 12351174) and *Gsc* (PMID: 9671576). Importantly, it constitutes the largest fraction of primitive streak cells at E6.5 and thus likely also contains cells that are committed to this state but otherwise pre-specified. Consequently, we termed it **“primitive streak pre-specified and anterior.”**

Cluster 2 emerges around E7.5 as cluster 37 diminishes and contains cells of the primitive streak and nascent mesoderm. We annotated this state **“primitive streak late,”** in line with its high expression of *Hoxb1*, which extends along the primitive streak and is present in the mesoderm of the posterior embryo around E7.5 (PMID: 1983472). Moreover, the expression of *Eomes* is substantially reduced compared to the primitive streak states that are mainly present at E7.0 (state 37 and 3).

Cell states of the caudal epiblast (26, 30, 31) also express *T*, *Evx1* and *Lhx1*. Their more posterior position within the embryo is supported by continued *Hoxb1*, reported to be expressed not only in the posterior mesoderm but also in the ectoderm anterior of and lateral to the primitive streak at E7.75 (PMID: 1983472). Cluster 26 (present around E7.5-8.0) and cluster 31 (present around E8.0-8.5) have a high fraction of cells that co-express *T* and *Sox2*, which is characteristic of neuromesodermal progenitors (NMPs). Thus, these states were annotated as **“NMPs early”** (cluster 26) and **“NMPs late”** (cluster 31) according to their temporal dynamics. In addition to their mesodermal signature, both states express the neuroectodermal genes *Sox3*, *Sp8*, *Nkx1-2* and *Olig3* (reported to be expressed in NMPs and derivatives, PMID: 28826820). State 26 (NMPs early) appears to give rise to state 31, at least partially, which might also contain more neuroectodermally-committed cells, as indicated by a slightly increased fraction of cells expressing of *Pax3* (PMID: 28826820).

In contrast, cluster 30 emerges around E8.0-8.5, does not express *Sox2*, but instead expresses genes of the **“presomitic mesoderm”** such as *Tbx6* (PMID: 8954725), *Snail* (PMID: 9671584), *Dll1* (PMID: 9671584) and *Nrarp* (PMID: 19268448). Notably, we also detect the intermediate mesodermal marker *Osr1* (PMID: 10473132) in a large fraction of state 30 cells, suggesting that the state may also contain cells of this tissue. Transcriptional similarity (e.g. the high expression of *Hoxb1*, *Dll1*, *T*) suggests that state 30 is derived from state 2, though they may also proceed directly from NMPs. Interestingly, state 31 has a substantially larger fraction of cells expressing *Cyp26a1* compared to state 30, which may indicate a more caudal position within the embryo (PMID: 11520679).

Cluster 12 is most prevalent around E7.5-8.5 and comprised of cells of the lateral plate mesoderm. It expresses *Foxf1* (PMID: 11124112) and *Isl1* (PMID: 14667410). Similar to state 30 (presomitic mesoderm), cluster 12 may also contain cells of the intermediate mesoderm as indicated by expression of *Osr1* (PMID: 10473132). Expression of genes specific to the caudal part of the embryo, such as *Cdx4* (PMID: 19906845) and *Hoxd9* (PMID: 1676674), also supports a posterior position. From these data, we assigned this state **“posterior lateral plate mesoderm”**, though it may contain mesoderm of other structures as well.

Cluster 20 is present around E7.5-8.0 and resembles **“splanchnic lateral/anterior paraxial mesoderm”** (PMID: 21498416). This state expresses the anterior mesoderm specific *Tbx1* (PMID: 8853987), which was described to be exclusively expressed in the anterior embryonic mesoderm, rostral to the node at E7.5. Furthermore, this state expresses: *Tcf21*, which is expressed within the first branchial arch at E8.0 (PMID: 9733105); *Isl1*, which is expressed at the earliest stages of cardiac development (PMID: 25174608); and *Prdm1*, which is expressed in splanchnic mesoderm (PMID: 12204275).

Cluster 34 also expresses several genes characteristic for the pharyngeal mesoderm (PMID: 21498416) and is present mainly around E8.5. We termed this state **“pharyngeal arch mesoderm”** by the expression of *Tbx1* (PMID: 8853987, PMID: 21364285), *Six1* (PMID: 21364285), *Eya1* (PMID: 21364285) and *Pax9* (PMID: 9732271), which are

associated with this tissue as well as other cranial mesenchymal structures. Cluster 6, present at E7.5-8.5, was termed **“secondary heart field/splanchnic lateral plate mesoderm”** due to the expression of *Isl1*, a marker for the secondary heart field (SHF, PMID: 25174608; PMID: 14667410). It also displays high *Hand2* expression, which is found in the lateral mesoderm and developing heart from E7.75 onwards (PMID: 8533092). The expression of *Foxf1* and *Irx3* support the notion that state 6 contains cells of the splanchnic (*Foxf1*) and also of the somatic (*Irx3*) lateral plate mesoderm (PMID: 11124112). Overall, this state might be composed of many cells that eventually contribute to the formation of the heart tube. Cluster 21, present around E8.0 and 8.5, is largely composed of cells of the **“primitive heart tube”** according to the expression of *Myl7* (PMID: 11245568), *Nkx2-5* (PMID: 12141429, PMID: 11336496), *Hcn4* and *Tbx5* (PMID: 8853987), *Mef2c* (PMID: 8026334) and *Myocd*. *Hcn4* and *Myocd* have been reported to be rather specific for the FHF (PMID: 23974038, PMID: 25174608). The scarcity of known markers that are distinct for the First and Second Heart Fields makes it difficult to conclude with certainty whether 6 gives rise to state 21 or whether 21 develops from state 20 independently and in parallel. Nevertheless, higher *Hoxb1* expression in state 6 compared to state 21 suggests that it is located posterior to the primary heart tube.

Cluster 18 begins to emerge at E7.5 and continues through E8.0-8.5. We termed this state **“somites”** as it expresses *Ripply2*, which is reported to be expressed at the site of somite formation (Somite 0-1, PMID: 18045842), as well as *Tbx18* (PMID: 11118889) and *Pax3* (PMID: 18644785), which are expressed throughout formed somites. Higher expression of *Aldh1a2* (PMID: 17849458) and *Foxc1* (PMID: 8375339) in this cell state compared to cluster 30 (presomitic mesoderm) indicates that this state preferentially contains cells of the somatic rather than the presomitic mesoderm. Notably, in the lineage tree we connected the somite state with state 20 which contains amongst others more anterior portions of paraxial mesoderm that are expected to undergo somite formation within this developmental window. In contrast, presomitic mesoderm of state 30 is expected to give rise to somites at later developmental stages.

The entire lineage of hematopoietic and endothelial cells was marked by the expression of *Tal1*. Cluster 13 is present at E7.0 and is thereby the first detected state expressing *Tal1*, *Kdr1* and *Etv2*, characteristic for **“hematopoietic and endothelial progenitors”** (PMID: 24052951). Cluster 36 likely arises from Cluster 13 and was termed **“primitive blood progenitors.”** It is most prevalent around E7.5 and characterized by the expression of *Hbb-bh1*, *Gata1*, *Nfe2* (PMID: 29311656), *Klf1* (PMID: 16380451) and *Runx1* (PMID: 10226014), genes known to demarcate the first wave of blood production in the embryo.

Cell states 9 and 22 appear to be **“primitive blood early and late.”** They are prevalent at E8.0 and E8.5, respectively, and express marker genes mentioned for cluster 36. Within this lineage, we see a progressively decreasing fraction of *Runx1*+ cells from state 36 through 22, consistent with previous reports (PMID: 10226014). Cell state 32 also appears to arise from cells of state 13 at E7.5. We characterized these cells as **“angioblasts”** by the high expression of *Pecam1* (PMID: 24052951, PMID: 24550118), *Cdh5* (PMID: 24052951), *Tek* (PMID: 8187650) and *Lyve1* (PMID: 27880904). This state also expresses *Gja5* and *Ephb4*, an arterial and venous signature consistent with their endothelial identity (PMID: 21793101).

Cluster 38 and 23 represent cells of the axial mesoderm identified by the expression of *Noto* (PMID: 15533813), *Shh* (PMID: 8069909) and *Foxa2* (PMID: 8375339). Cluster 38 emerges at E7.0 and was therefore annotated to be the **“node,”** formed at the anterior most position of the primitive streak (specifically state 3). Subsequently, cluster 23 emerges around E7.5 and persists into E8.5, suggesting that these are cells of the developing **“notochord”** that expands anteriorly from the node.

#### Extraembryonic mesoderm lineage

Cluster 15, present around E7.5-8.5, and cluster 41, present around E8.0-8.5, were annotated as the “**amnion mesoderm early**” and “**amnion mesoderm late**” respectively according to the expression of *Foxf1* (PMID: 11124112) and *Postn*, which is highly specific (PMID: 22966238). *Foxf1* is also expressed in the “**allantois**” (cluster 5), another extraembryonic mesoderm cell state that emerges around E7.0 and then persists throughout the developmental window investigated here. The allantois expresses *Tbx4* (PMID: 21932311, PMID: 8853987) and *Tbx20* (PMID: 10940636), as well as posterior Hox genes *Hoxa10*, *Hoxa11* and *Hoxa3* that are very specific to this tissue (PMID: 22219351).

#### Germline

Cluster 27, of which a small number of cells are already present at E6.5, is unambiguously the primordial germ cell state (“**PGCs**”) according to the expression of *Dppa3* and *Prdm1* (PMID: 18583473), *Prdm14* (PMID: 18622394) and *Nanos3* (PMID: 20174582).

#### Extraembryonic and embryonic endoderm lineages

We identified endodermal cells according to their expression of *Foxa2* (PMID: 22236333, PMID: 8306889) and *Sox17* (PMID: 11973269). Cluster 4 is most prevalent at E6.5 but persists through E7.0, and was annotated as “**primitive and definitive endoderm**,” with two distinct placements in our lineage tree (**Fig. 1c**). Cluster 4 represents a large fraction of E6.5 embryos (15%), suggesting an abundance of extraembryonic endoderm, though it likely also contains cells of the emerging embryonic endoderm. Separating these cells further is complicated by their highly similar gene expression signatures, which diverge later to become more obvious (see differential analysis of gene expression for E7.5 and E8.25 in PMID: 22236333). Cluster 29 and 40 represent “**visceral endoderm early and late**” as these two states emerge successively and both express *Cubn* and *Amn* (PMID: 20637190) as well as *Amot* and *Slc39a8* (PMID: 17576135). Cluster 14 appears to be “**parietal endoderm**,” which expresses *Srgn* (PMID: 11369593) and *Thbd* (PMID: 8681807) as well as *Gkn2* and *Pga5* (PMID: 28012457). This state was captured irregularly across embryonic replicates but detected consistently over development, likely due to technical variability during isolation that results from its location as the outermost extraembryonic layer. Both the parietal and, to a lesser extent, visceral endoderm express *Sox7*, which distinguishes them from cluster 7 (PMID: 11973269).

Cluster 7 is present from E7.5-8.5 and composed of embryonic endoderm cells. Because the main endodermal structure present at these developmental stages is the primitive gut, the state was termed “**gut endoderm**.” It is characterized by the absence or comparatively reduced expression of the above mentioned visceral and parietal endoderm markers, as well as by presence the definitive endoderm markers *Pyy* (PMID: 17683524), *Foxa1*, *Cldn8* and *Sorcs2* (PMID: 22236333). Whether this cell state directly emerges from state 3 or proceeds through some intermediate cells contained within state 4 is unclear. Several recent works have confirmed that a subset of cells within this state is of extraembryonic origin (PMID: 30787436, PMID: 30959515, and PMID: 31086336). However, because the continued presence of these cells beyond E8.75 and their developmental function remain unknown, we decided to place this state solely within the embryonic portion of our tree.

#### Embryonic ectoderm lineage

Cluster 8 and cluster 19 are both already present at E6.5 and are generally similar in gene composition to epiblast. Cluster 19 becomes less prevalent towards E7.5, while cluster 8 peaks in abundance at E7.0 and comprises a substantial fraction of the embryo. Both clusters are enriched in *Otx2*, *Zic2*, *Utf1* and *Fgf5* albeit to a lesser extent than in the epiblast state 17.

205 Additionally, expression of Sox2 and Pou3f1 indicate that cells of these states originate from  
206 the more anterior part of the epiblast (PMID: 24131634), which is in line with the  
207 substantially lower fraction of cells expressing markers of the primitive streak. Their  
208 ectodermal character is supported by the expression of Sox3 (PMID: 10446282) and a small  
209 number of cells (~10%) with detectable Six3 and Hesx1, which are both neural markers  
210 (PMID: 24131634). Thus, we termed both states **“ectoderm early 1”** (cluster 8) and  
211 **“ectoderm early 2”** (cluster 19). We placed these states jointly within the lineage tree to  
212 highlight the ambiguity of their direct developmental relationship: it is unclear whether one  
213 differentiates into another or if they represent distinct regions of the differentiating pluripotent  
214 field. However, state 8 displays a higher fraction of cells expressing the epiblast markers,  
215 which indicates a more direct relationship to state 17. Furthermore, state 3 cells (primitive  
216 streak pre-specified and anterior) are transcriptionally most similar to state 19, suggesting that  
217 state 19 may be comprised of cells that are localized in a similar region within the epiblast or  
218 are fated to transverse through the anterior primitive streak.

219 Cluster 1, 11, 24, and 39 represent neuroectodermal clusters characterized by the  
220 expression of Sox1, Sox2 (which we consider to be a neuroectodermal marker from E7.5  
221 onwards) and Sox3 (PMID: 10446282). Cluster 24 emerges at E8.0 and expresses fore- and  
222 midbrain-associated Otx2, the midbrain marker Wnt1, as well as En1 and Pax2, which mark  
223 the mid-hindbrain border (PMID: 11253000). This cluster also contains cells that express  
224 Foxg1, which emerges around E8.5 within the anterior neural folds (PMID: 16530751) and  
225 Six3, reported for the most rostral neuroectoderm (PMID: 11532921). Taken together, we  
226 conclude that cluster 24 represents the developing **“fore/midbrain”** and likely emerges from  
227 cluster 1, which is present at E7.5-8.0 and is Six3, Otx2, Pax2 and En1 positive.  
228 Consequently, cluster 1 was termed **“neural ectoderm anterior.”** Cluster 11 is most  
229 prevalent at E7.5 and annotated as **“neural ectoderm posterior”** due to the expression of the  
230 hindbrain marker Gbx2 (PMID: 11253000, PMID: 11532921) and Hoxa1 (PMID: 9053316).  
231 Cluster 39 is present at E8.0-8.5 and appears to be **“future spinal cord”** by its expression of  
232 Hoxb8 (PMID: 8096483), Nkx6-1 and Olig2 (PMID: 15652703). We placed this cell state  
233 downstream of state 11 because they both represent posterior neuroectodermal cells and  
234 emerge successively. However, we include a dashed line in our lineage tree to account for a  
235 possible dual origin from neuromesodermal progenitor cell states (26 and 31).

236 Cluster 33 is most prevalent at E8.5 and appears to be **“neural crest”** by the  
237 expression of Sox10, Sox9, Twist, Foxd3, and Tfap2a (PMID: 24780627, PMID: 22889333,  
238 PMID: 22889333). It was placed in the tree downstream of the developing brain (state 24).  
239 However, more posterior structures like the spinal cord also produce neural crest cells and are  
240 expected to contribute to this cell state. Cluster 35 is present around the same time and did not  
241 display any enrichment of specific marker genes that would have allowed an anatomical or  
242 cell type specific annotation. Its transcriptional profile appears most similar to state 33, which  
243 is why it was termed **“similar to neural crest”** and placed adjacent to it in the lineage tree.

244 Cluster 10 and 16 both emerge around E7.5 and progressively increase in relative  
245 abundance. The presence of Dlx5 suggests that both are non-neural ectoderm (PMID:  
246 9763476). Cluster 10 expresses Six1 and Eya1, consistent with a **“preplacodal ectoderm”**  
247 identity (PMID: 19027001), whereas cluster 16 was annotated as **“surface ectoderm”**  
248 because it expresses Trp63 (PMID: 14757276), Tfap2c (PMID: 1989904) and Grhl3 (PMID:  
249 16831572).

#### 251 Extraembryonic ectoderm lineage

252 Cluster 0, 25 and 28 are Elf5 positive and belong within the extraembryonic ectoderm (Xecto)  
253 lineage (PMID: 25446535). Canonical trophoblast stem cell markers like Eomes, Cdx2, Sox2  
254 and Esrrb are detected in cluster 25 and 0 (PMID: 25446535, PMID: 11433360). Both are  
255 present and have similar proportions within embryos at E6.5. However, cluster 0 persists as

development proceeds while cluster 25 rapidly diminishes. Consequently, we termed cluster 25 “**extraembryonic ectoderm early**” and cluster 0 “**extraembryonic ectoderm late**.” Both states contain cells expressing *Spry4* as well as *Ets2* and *Ascl2*, indicating that they contain cells of the proximal and distal Xecto/ectoplacental cone (PMID: 25446535). Cluster 28 shows substantially lower frequencies of trophoblast stem cell markers and expresses differentiation markers like *Plac1* and *Prl3d1*, indicating that it is comprised of “**differentiated trophoblasts**,” including cells of the ectoplacental cone and trophoblast giant cells (PMID: 25446535, PMID: 18662396).

#### Comparison with the single-cell reference of WT gastrulation by Pijuan-Sala *et al.* 2019:

The annotation of cell states between the single-cell reference described here and the one previously published by Pijuan-Sala and colleagues is overall highly congruent. However, we note some differences outlined in the following:

Cells of our **cell states 15 and 41, amnion mesoderm early and late**, respectively, correspond to a cluster termed “mesenchyme” in the reference by Pijuan-Sala *et al.* We do not find any enrichment for mesenchyme markers such as *Fos*, *FN1*, *VTN* and *S100A4* in these cells. However, mesenchyme encompasses many cells of the mesodermal lineage, including the amnion mesenchyme as part of the extraembryonic mesenchyme, which is where the annotations of both references might describe the same cells using different but overlapping terminologies. Our nomenclature was based on the highly specific amnion mesoderm marker *Periostin* (*Postn*), which is present in 35% of state 15 cells and in 88% of state 41 cells (PMID: 22966238).

Cells of **cell state 12, posterior lateral plate mesoderm**, correspond to a cluster termed “extraembryonic mesoderm” in the reference by Pijuan-Sala *et al.* The majority of these cells express *Foxf1*, which is a shared marker between the extraembryonic and lateral plate mesoderm (PMID: 11124112). However, we concluded that most cells are rather embryonic than extraembryonic (i.e. allantois or amnion) mesoderm based on three observations:

1. State 12 cells were comparatively low in the expression of allantois markers *Tbx4* (7% positive cells) and *Tbx20* (9% positive cells), whereas in the allantois (state 5) these markers were detected in 38% and 58% of cells, respectively.
2. The amnion marker *Postn* was not detected in state 12 cells, whereas it was detected in 35% and 88% of cells in amnion mesoderm early and late (state 15 and 41), respectively.
3. We detected the intermediate mesoderm marker *Osr1* in 49% of cells in state 12, indicative of embryonic rather than extraembryonic mesoderm. *Osr1* and other markers indicated that state 12 might be composed of posterior mesodermal cells from different structures in addition to the posterior lateral plate mesoderm. Application of our cell state data to a companion molecular recorder publication (Chan, Smith *et al.* 2019) also suggests that posterior lateral plate clusters with the splanchnic lateral plate by shared ancestry (see **Extended Data Fig. 8d** of Chan, Smith *et al.* 2019).

We also noted that in our reference a small subset of state 10 cells, annotated as preplacodal ectoderm, is transcriptionally similar to and clusters near state 7, the gut endoderm. These cells are assigned to “gut” using the Pijuan-Sala *et al.* criteria. This discrepancy is apparent when cross-referencing cell state definitions using scRNA-seq data from E8.5 embryos and can be seen in our Uniform Manifold Approximation and Projection plot in **Fig. 1b** (see dark green state 10 cells close to yellow cells of state 7). Though this may represent a minor artifact of our strategy, these cells likely represent a subtly different subcluster within the gut endodermal lineage that warrants further investigation.
